# Supplementary material
Source: PubMed Central journal article supplement (PMC5661890)
Supplement: NIHMS909538-supplement-1.pdf [file NIHMS909538-supplement-1.pdf]

## **Inventory of Supplemental Information**

### **Adkins et al**

1. Figure S1: Development and characterization of IL21-VFP reporter mice.
  - Related to Figure 1, provides validation of novel reporter.
2. Figure S2: Further characterization of IL21-VFP reporter mice.
  - Related to Figure 1. Provides further validation and characterization of the reporter.
3. Figure S3: RNA sequencing sort parameters, validation and a/b TCR profiling.
  - Related to Figure 3. Shows the sorting information used to collect the data for Figure 3.
4. Figure S4: Further characterization of thymocytes comparing WT and BCL6-floxed IL21-VFP mice.
  - Related to Figure 4. Shows there are no differences in the development of CD4<sup>+</sup> T cells in the thymus due to BCL6 deletion. Directly related to Figure 4 panel F.
5. Table S1: Expression data of N, ACT and nT<sub>H</sub>21 signature genes.
  - Related to Figure 3. Is the data used for Figure 3B-E. Uploaded as an excel file.
6. Table S2: KEGG & GO Pathway Enrichments.
  - Related to Figure 3. It is the pathway annotation data used for Figure 3B. Uploaded as an excel file.
7. Table S3: Detailed expression of T<sub>H</sub> related genes.
  - Related to Figure 3. Is the RNA seq gene expression data used to generate Figure 3D & 3E. Uploaded as an excel file.
8. Supplemental Experimental Procedures
